# Supplementary material
Source: Research Square preprint supplement (doi:10.21203/rs.3.rs-8598685/v1)
Supplement: Supplementary file 1 [file 875768c7a1dcacb5c8952a6c.xlsx]

## Sheet: A. General Questions
		1. DIFE	2. DoL	3. DGHS	4. WHO	5. BKMEA	6. GSK	7. BSR	8. Primark	9. CRP	10. RAPID	12. Workers Association (NCCWE)	13. Workers Association (FGW)	14. Swisscontact
	1. What is your general feeling about the existing services provided by Enterprise Clinics in factories?	1) Small sized factories are more in need of assistance when it comes to complying with laws and regulations. 2) Recruitment and retention of doctors within premises is a major challenge.	1) The existing services need to be upgraded with digitalization. 2) On this point use of early screening tools at Enterprise clinics will be very beneficial. 3) Raising general awareness about the importance of early screening to prevent major health problems is crucial.	NCDC of DGHS is not aware of existing services provided by enterprise clinics in factories	There is significant Lack of Policy and definite Operation plan for the service provided by Enterprise Clinic in factories.	Almost all the factories, which are member of BKMEA which are following the BLA, BLR accordingly.	The current situation in factories for enterprise clinic is poor. Some garments have lots of workers but they dont have any medical center along with the equipments. So this side can be better if the steps taken properly.	Existing workplace health facilities are often under-used and poorly managed (under-used business resource). Existing workplace health facilities are often under-used and poorly managed (under-used business resource).	The practitioner requirement is available but there is no qualified practitioner in this sector. Doctors, Referrals are available but there is no full time nurse for giving atleast primary treatment to any situation.	In general, too much effective in the perspective of RMG sector and RMG employes is the best solution as all the workers have the capabilities to take medical treatments but they dont find any interest to take regular checkups or consultations following there health.	If I say one thing, it is relevant to the seminar held on the 23rd. Even where doctors are present, the services often do not function properly, and in many places doctors are not available at all. Because there is no long-term dataset, proper health monitoring of workers is not possible. Factory conditions and healthcare supplies are poor and remain largely inactive in many cases. Workers often …	The current situation is not good according to RMGs worker size and capacity. However, there is a lack of proper health service on existing facilities. There is no proper monitoring by the government which makes a neglecting situation towards the health of the worker by the owners.	Overall the current situation is ok, but somehow the awareness & counseling is currently missing. Owners always ignore this matter . Post treatment follow up is also missing.	Overall, I think it is very much about going hand in hand, but currently it is mostly bookish training and not practical enough. Training alone is not sufficient; the workplace environment or a conducive working environment is equally important. There should be a philosophy of skills development, which also contributes to making the workplace productive and creating skilled workers. Skilled perso…
	2. What are the major benefits of Enterprise Clinics – both for workers and employers?	Major benefits for Workers: 1) Ensuring social safety net comprising OSH 2) Less costly general healthcare Major benefits for Employers: 1) Lower employee absenteeism 2) Higher rates of worker retention 3) Higher productivity 4) Lower rates of monetary compensation resulting from a lower rate of illness and accident	1) Both workers and employers will be benefited. 2) As the workers can able to take all the benefit of the enterprise clinic with their own responsibility. From this place they can also be guided for any referral hospital where they go for their further checking. 3) However, the early screening will help the workers most to detect health problems and remedice 4)The Enterprise Clinic should be tag…	No Comments	Ensuring primary health care services along with OSH for workers. Better health of workers will ensure better productivity for employers.	1) Social Safety net for employees 2) Healthy and happy workers are asset of owners to ensure producitivity and business growth.	In a major sector of enterprise clinic, they can use the benefits of having enterprise clinic as a social audit. They can raise their impacts, challenges and problems through the enterprise clinics. It can also helps the employees to understand their needs and situation to take particular services to better their lifes.	1) Addressing workers’ health needs contributes to increased productivity and improved workplace relationships; 2) Better health services can strengthen buyer-supplier relationships.		Employers can be benefited. From the concept of bangladesh, a small contribution from the owners can bring the biggest support towards the employees. The most important point is they can set skill person to their enterprise clinic and the workers can run by their own money. It is a need to develop the understand towards the workers that a simple contribution from yours also can bring a change tow…	It has to be a collective benefit. From a factory perspective—especially in the garment manufacturing sector—workers on the production floor play a key role in maintaining product quality. If a worker is unwell but forced to work strictly without being able to express or show their condition, the situation is often covered up. This directly affects productivity, and the relationship is reciprocal…	Both workers and employers can utilize their expense of health properly.	Both owners and employers can be benefited. Including the owners the employers family members also can able to take services.	This also considers economic benefits. I would like to highlight two things: 1) Inclusive Economic Development – Inclusivity, support for people with disabilities, and those who are marginalized should play a role in the economic sector. From this perspective, productivity is a key factor. Both workers and employers benefit—clinics can directly improve the quality of productivity. It also ensures…
	3. What are major challenges of Enterprise Clinics?	1) Ensuring the availability of clinical staff. 2) No adequate health record 3) high operational cost.	1) Ensuring the availability of clinical staff. 2) No adequate health record 3) high operational cost.	No Comments	Challenges at policy level; Major stakeholders are not aligned regarding OSH and primary health care service delivery at factories. ILO, MoLE and MOWFA need to work together to include such issues in government sector programs. Challenges at operational level; Incorporation of existing primary health care services at government institutes along with existing health facilities within the factories…	1) There are compliance Issue but somehow depending on the buyers need and accordance to the labour law, the challenges are getting less. 2) Even if there is no full time doctor, with other alternatives such as paramedic, nurses are covering all the needs at the existing Enterprise Clinics.	This depends on the Owners to mind to establish the enterprise clinic. However, it can be solved only if the owners want. 2nd I can say the quality of the service. 3rd the buyers requirement. If the buyers only look for their production, it is a major challenge too.	1) Unavailability of clinical staff during working hours specially female doctors. 2) Inadequate Health products. & OTC Drugs. 3) Less focus on SR, HR for female workers 4) Less encouragement from HR and production staffs of RMG to avail health services from existing facility . 5) Poor communication among workers about health education and secondary referral. 6) No visible incentives for factory …	Such injuries may occur, and in those cases, COVID could be a concern. Focusing on those problems could help, but for chemical hazards and noise-related issues, the extent of health risk and how capable the system is to handle it is unclear. Regarding standards, we also don’t know what the proper standards should be. Staff are counting every minute and doing what they must, which is why they cont…	Context based challenges, A doctor don't want to work at an RMG facilities because they dont found any significant fame from this sector. This kind of mentality brings the most hardest challenge to work for them. Also the lack of peoples towards the professional works which brings the retention and turnover rate high. Motivation and physical effects are one of the major challenges as to understan…	Directly delivering services to the end users is our biggest challenge. Behind the end users, there are multiple service providers and other stakeholders, and the existing gaps need to be addressed at that level. In this context, we need to go deep into the system to identify and solve these issues. Time flexibility within working hours is a major concern. We do not have enough time allocated for…	Poor mentality of establishing any necessary step towards health by the owner and government which causes challange to workers health. But in the end, cost is one of the key challenge as workers cannot able to provide there full cost towards their treatment and owners are careless on this part. They can reduce the problem by the co-pay model but they should take initiatives first.	Owners mentality are not focused to the workers health No prevention steps are taking towards a workers health. But the biggest challenge is that there is no awareness campaign or awareness on any topic or guidance towards health safety. That effects the monitoring of the health of a worker.	From collusion to the grooming of the industry: RMG is a huge industry, but policies have not been properly linked or developed for it. It started with bad examples, and then the sector began to be regulated. 1) It is not well-structured, not very well-aligned, and not well-connected or established. If you look at malpractice and bad practices, it’s still a very large issue. The health clinics th…

## Sheet:  B. Model EC Questions
		1. DIFE	2. DoL	3. DGHS	4. WHO	5. BKMEA	6. GSK	7. BSR	8. Primark	9. CRP	10. RAPID	12. Workers Association (NCCWE)	13. Workers Association (FGW)	14. Swisscontact
	4. In your opinion, what type of services should be provided by Enterprise Clinics for:		Every service related to health needs to incorporate in this enterprise clinic in all RMG sectors. It will help all the employers and owners to gained the trust that they can get all the service in their workplace.			More over the services, the 3 things need to advocate in this side. And they are as below; - Availability of 24 hours support with telemedicine - Mitigation of the digitization cost - Telemedicine should be supported with specialized doctor	All the health related services needs to provide in the enterprise clinic. Along with all the medical health care services, we also needs to focus on the woman harassment issues, to mitigate it on enterprise clinic.				- Post-rehabilitation is of utmost importance. So are post-injury compensation and health services. - OSH is often talked about, but requires more implementation in reality.			Basic general healthcare should be available—for example, gastric issues, stomach pain, and other common illnesses. Occupational health should include preventive measures, such as awareness posters, and management of acute injuries like needle-stick incidents. This is a continuous process. In many workplaces, PPE is not properly used—management often does not provide needle guards or eye protecti…
	a General healthcare for workers	TRUE	TRUE	TRUE	TRUE	TRUE	TRUE	TRUE	TRUE	FALSE	TRUE	TRUE	TRUE	TRUE
	b. Prevention against diseases and injuries	TRUE	TRUE	TRUE	TRUE	TRUE	TRUE	TRUE	TRUE	TRUE	TRUE	TRUE	TRUE	TRUE
	c. Acute Injury management	TRUE	TRUE	TRUE	TRUE	TRUE	TRUE	TRUE	TRUE	TRUE	TRUE	TRUE	TRUE	TRUE
	d. Post-injury rehabilitation	FALSE	TRUE	FALSE	FALSE	FALSE	FALSE	FALSE	FALSE	TRUE	TRUE	FALSE	FALSE	FALSE
	e. Women-specific health issues	TRUE	TRUE	TRUE	TRUE	TRUE	TRUE	TRUE	TRUE	FALSE	TRUE	TRUE	TRUE	TRUE
	f. Mental Health	FALSE	TRUE	TRUE	TRUE	FALSE	TRUE	FALSE	FALSE	FALSE	TRUE	TRUE	TRUE	TRUE
	5. What type of medical equipment should be available in Enterprise Clinic?		Relevant to every hospital/ clinic, all the equipments are needed for enterprise clinic. The main focus should be the doctors, However the main issue arise when we talkes about doctors presence. We must have to ensure the doctors presence. The doctors salary needs to be handsome salary, and all other benefits. so that they can get encouragement for the job.	Workplace injury and general health care for workers Acute injury management , primary diagnosis of common illness and general healthcare for workers Acute injury management minor Primary and preventive care for reproductive health			All the equipments relevant to medical colleges and clinics.						- Equipment for ensuring basic health services and primary treatment should be ensured.	For diagnosis and disease management, direct tools like stethoscopes and other necessary equipment should be available. For women’s health issues, sanitary napkins should be provided, and in large factories, contraceptive measures are being arranged. Awareness is extremely important.
	a. For Diagnosis	TRUE	TRUE	TRUE	TRUE	TRUE	TRUE	TRUE	TRUE	TRUE	TRUE	TRUE	TRUE	TRUE
	b. For Disease Treatment	FALSE	TRUE	TRUE	FALSE	TRUE	TRUE	TRUE	TRUE	TRUE	TRUE	TRUE	TRUE	FALSE
	c. For Injury managemenet	TRUE	TRUE	TRUE	TRUE	TRUE	TRUE	TRUE	TRUE	TRUE	TRUE	TRUE	TRUE	TRUE
	d. For Post-injury management	FALSE	TRUE	FALSE	FALSE	FALSE	FALSE	FALSE	FALSE	TRUE	FALSE	FALSE	TRUE	FALSE
	e. For Women's health issues	TRUE	TRUE	TRUE	TRUE	TRUE	TRUE	TRUE	TRUE	TRUE	TRUE	TRUE	TRUE	TRUE
	6. What type of environment should be there in Enterprise Clinic?	- The kind of physical environment that has been required by existing labour law. Standards for light and ventilation must be met.	The main focus should be doctors availability in the enterprise clinic as per BLA and BLR	As per standard health clinic.	Adequate light and ventilation separate consultancy rooms considering female workers' privacy.	The enterprise clinic should be flexible with the workers mostly.	The environment should be hygienic.	Adequate light and ventilation separate consultancy rooms considering female workers' privacy.	The environment should be there in enterprise clinic according to the law.	- A spacious (instead of congested and confined) ambience will add to the psychological comfort of workers.	Workers’ rights should ensure that factory owners create a work environment where workers can perform their duties safely and with dignity. Organizations like BKMEA/BGMEA should be involved in this process. Issues of mental and physical health are directly linked to productivity—when health is neglected, productivity decreases. Therefore, a work environment is needed where a worker’s mental healt…	The environment should be according to the law.	The environment should user friendly and every workers can believe the EC. The clinic should be neat and clean.	In very limited spaces, facilities have been set up in a highly congested manner, especially in small garment factories, which affects the working environment. Naturally, labor laws already exist, and they must be properly maintained and enforced. For small factories, there should be a cluster-based arrangement. Many industrial areas, such as Narayanganj, should be organized and managed as cluste…
	7. What should be the minimum standard of staff in Enterprise Clinic?												No gender discrimination should be visible on this clinic where every gender finds equal rights. Lady doctors should check the lady workers.	It would be better to have specialized services. Having basic criteria is good, but specialized care is preferable. Health services need to comply with standards—there is no way to avoid this anymore. Everything exists on paper, but in reality there are no doctors, mainly because there is no career growth and inadequate financial incentives. This issue cannot be avoided. Two more things are also …
	a. Doctors (male, female)	As per labour law	In the very first, needs to ensure the staffs handsome salary and benefits towards encouraging to work. If possible, also provides the living place and other facilities to them.	According to existing labor laws and rules for both doctors, nurses, paramedics etc.	Number of clinical stuffs availability should be according to number of employees/ workers at industry along with type of work. 24/7 coverage or 30 days coverage can be arranged through assisted telemedicine (Full Coverage of paramedic or nurse and partial coverage of doctor’s presence in person)	Doctors should be available or hired by the RMG sector. Full time	Doctor should be BMDC registered	Atlreast one Female doctor once in a week & assisted telemedicine for rest of the time coverage.	Availability of Doctors and Nurses but must be qualified with empathetic attitude	- MBBS Doctors, senior staff nurse on payrolls	- Individual criteria depend on industry size.	They should be government authorized. A policy should be follow to hire them such as RMG Hazard treatments. Both male and female should be hired	Doctors: Both male and female should be minimum qualified. Following the government law they should be recruited. But the doctors need to have a empathetic attitude like hospital in patient environment and they have to serve the patient duly	Female doctors or doctors choosing career to be GP are preferable.
	b. Nurses (male, female)	As per labour law	In the very first, needs to ensure the staffs handsome salary and benefits towards encouraging to work. If possible, also provides the living place and other facilities to them.	According to existing labor laws and rules for both doctors, nurses, paramedics etc.	Number of clinical stuffs availability should be according to number of employees/ workers at industry along with type of work. 24/7 coverage or 30 days coverage can be arranged through assisted telemedicine (Full Coverage of paramedic or nurse and partial coverage of doctor’s presence in person)	Nurse, Paramedic should be well trained.	Atleast there should a nurse and paramedic with proper training.	Monthly full coverage with female nurses.		- MBBS Doctors, senior staff nurse on payrolls	- Individual criteria depend on industry size.	According to labor law		- Adequate allied health resources.
	c. Others	As per labour law						Monthly full coverage with female paramedic		- Mental health professionals for rehabilitative counselling - Professionals who are qualified to work for post-injury rehabilitation	- Should have scope for mental healthcare	Different physiotherapists for ear, eye, muscle, bone should be available.		- Adequate allied health resources.
	8. What type of medicines should be provided in Enterprise Clinic?	As per labour law	- Essential Service Package (ESP) medicines should be provided - If the antibiotic medicine prices are not affordable for the employees, the owners should provide the medicines - If it becomes a burden to the owners, atleast take the money from the employees like EMI system, So that they can complete the medicine course (Antibiotics/ Drugs for cronic care) .	OTC, Supplements	OTC, Supplements	OTC Drugs	All kind of necessary medicines	OTC Drugs + supplements	OTC, Supplements	OTC Drugs, Supplements	Provide and ensure availability of basic primary medicines, such as saline and pain relievers (over-the-counter drugs).	OTC Drugs	OTC Drugs. Pharmaceuticals should step forward to supply the medicines. For high priced antibiotics, the workers and owners can follow the copay model. However improved diet should be given as antibiotics can develop weakness.	OTC Drugs.
	9. Should ‘Enterprise Clinic’ have a referral system with nearest secondary & tertiary hospital?	Yes	- Every enterprise clinic should have a referral system with their nearest secondary and tertiary hospital. - Also, need to involve the private hospitals if needed for certain areas where the government hospitals are unreachable.	Yes, DGHS is ready to provide service to them through NCD corner of Upazila Health Complexes.	Yes. Information of referral service should be appropriately displayed at industry and also at referral center.	Yes	Yes, it is highly needed so that they can get proper treatment	Yes	Yes	Yes	Yes	Yes	Yes, indispensably	Yes
	10. Should there be an ambulance service to transfer serious patients to hospital?	As per labour law	It is not mandatory to have an ambulance of each indutry owns. For small and some medium rmg factories, it is not possible for them to maintain an ambulance. 24/7 on call ambulance service should procure.	No comment	On call ambulance services should be available. These ambulance service can serve to carry patients from ec to referral center and during other accidents (Individual or Mass)	24/7 on call ambulance service is needed.Somehow the big RMG has their own but for the small and medium an joint venture will be workable.	Yes	Yes	No	No, but for emergency support in can be linked with nearest ambulance from the nearest clinics/ hospitals not for general hours	No comments	No, but collaboration with nearest hospitals may take the ambulance support during the accident.	In collaboration with others for small and medium size industries	In collaboration with others for small and medium size industries
	11. Should ‘Enterprise Clinics’ organize awareness raising events for Workers on health, hygiene, nutrition, mental health, women’s health issues, etc?	Yes	Yes. The awareness raising is very important for the organization.	Yes	Yes, Industry should keep adequate visuals on hygiene, nutrition, mental health, women’s health issues to promote awareness.	Yes, Hygiene awareness, nutrition awareness, menustreal awareness and other counseling should be incorporated in the EC.	Yes, Need to be more careful with the woman harassment problems	Yes	Yes	Yes	Yes	Yes	Yes	Yes
	12. Should ‘Enterprise Clinics’ provide individual and group counselling to workers on health, hygiene, nutrition, mental health, women’s health issues, etc?	Yes	Yes, It is very important. Somehow, It will help the workers to recover by discussion and caring all their problems.	Yes	Yes, Industry should keep adequate group session & Leaflet distribution through a yearly calender.	Yes, there should be one where the workers can get proper understanding for their counseling and so on.	Yes, highly needed to have a counselling part in the Enterprise Clinic. However needs to be more careful with the woman harassment problems	Yes	Yes	Yes	Yes	Yes, Counseling should be available.	Yes, highly obtained. However, the counseling for each particulars should be obtained with individual. However, this should be spread to every workers who actually feel shy to talk.	Yes
	13. Should ‘Enterprise Clinics’ create awareness on ‘Occupational Safety & Health’?	Yes	Yes, It is very important too.	Yes	Yes, Through Visuals, Group session & Leaflet distribution through a yearly calender.	Yes	Yes, They should create awareness on Occupational Safety and Health	Yes	Yes	Yes	Yes	Yes	Yes	Yes
	14. Should ‘Enterprise Clinics’ maintain a computerized record of each Worker for medical history?	Yes, it may be considered as the best practice.	Yes, It is very important for them to maintain. Along with the digital dashboard and digital service for the Garments to monitor the records.	Yes	Yes. There should be one health record system for the workers, which will be monitored by looking after the diseases through the system. However, The system will connect to the MIS system. Also, The medicine and drugs disburse and use of the medicines can be tracked through the system.	Yes	Yes, it may be considered as the best practice.	Yes	Yes	Yes	Yes, survey	Yes	Yes	Yes

## Sheet:  C. Sustainability Questions
		1. DIFE	2. DoL	3. DGHS	4. WHO	5. BKMEA	6. GSK	7. BSR	8. Primark	9. CRP	10. RAPID	11. PRI	12. Workers Association (NCCWE)	13. Workers Association (FGW)	14. Swisscontact	15. CDD	16. BGMEA	17. GIZ	18. UNFPA	19. CPD	20. MoLE	21. Central Fund
	15. Do you think a ‘Model Enterprise Clinic’ will be financially affordable for employers? What elements do you think are not affordable?	Affordable for Large and medium size industries but small size industries have challenges . High operational cost ( remuneration of doctors, medicine other than OTC, bill payments to referral centers etc;)	Yes, it is possible for RMG sectors to provide Model Enterprise Clinic. Somehow, the initiative should be taken by the owners. But it can be a burden to the owners and some will not get courage to establish a model enterprise to their factories. It this case, the employees contribution can be a major role to establish the Model Enterprise Clinic. Atleast the owner should bear 60% of the cost and …	No comments	Its affordable. Need to mitigate the challanges with operational cost.	Yes. Copay model might be integrate to make it sustain.	Yes, But active involvement for the owners are highly appreciated.	Yes	Yes,	Not affordable for long term diseases. Rehabilitative disease or conditional diseases need long term therapy and for that EC is not a perfect choice to do. But to make it sustainable all screening services should be within the clinic.	- Interventions from government are needed. - Stakeholders need to decide collectively on how workers can be facilitated appropriately. - Govt hospitals can work in collaboration. - Nurses or paramedic can be instrumental in providing for primary healthcare support. - EC maintained through collective effort at a close proximity to factories.	- This should be initiated with a collaborative approach. Imposing the complete responsibility on owners might be futile. International organizations, buyers and other related stakeholders can be onboarded collaboratively. - Legal obligations need to be reinforced. - Workers can participate in Co-paying systems. - Social businesses can be integrated into the loop.	It should be done tripartitely. It is a employers responsibility, if the worker has a contribution mechanism, Government also need to get involved. ILO have to engage both onwers and workers and show them the benefits of establishing EC. The both benefits and cost return should be visible to the owner and workers to understand the need to EC.	Yes, it is affordable to establish. Workers should understand their needs and create awareness of their health and what necessary steps needs to take them only to motivate the workers to think for their health. The owners need to change their perspective and think of the health of the workers. Government also needs to take strong step towards the health of the worker. Also show the benefit to the…	This is affordable. A Co-pay model can be an easy access to establish this Model Clinic. For small factories there should be something cluster based.	No comments
	16. What can be the most important elements to motivate factory owners to implement a Model EC?	- Better health of workers ensure better productivity and profit. - Less abstinence, - Retention of experience workers due to high satisfaction. - Ensure compliance, regulatory and buyer requirements.	In three (3) ways the owners can get motivated to establish model EC, 1. To show the output of healthy workers production amount. If the workers get some health problems, they cannot do their job, they can not deliver the products in time. 2. In most cases, if the workers are absent they can also get the necessary services from their facility. It’ll bring the encouragement to the workers to work …	No comments	share the benefits of EC in terms of numbers ( services/ financial outcome)	-Copay model results can motivate owners by showing them the existing examples. -Health records helps to make the decision. -Also the digital record service towards the owners able to make a good decision and develop their business more and pro active with workers situation.	Owners perspective needs to change. According to research, investment of 1 taka towards workers health can bring 3.5 taka in return to them, through better productivity of workers during working hour.	several scopes of cost optimization to maintain model EC	Showing the sustainability plan to the Owners. Provide examples of others and share guidelines which should they do to improve their income.	Communicating that more outcome from employees means greater good for the factories, and workers' health is the key to achieving that.	- Pharmaceuticals companies can form a partnerships to collect drugs and health products on a cheaper rate. This will also reflect well on their CSR portfolio.	- Incentives of owners need to be presented effectively. Case studies from other countries that testify to their resultant success can be presented. - Laws and legal bindings need to be communicated to factory owners.	At the very first, from our experience, is the perspective of the factory owner. However, their 1 taka investment towards workers health can bring 3.5 taka in return to them, through the better outcome during working hour.	By showing the benefits of the health facility in a factory. However, a joint discussion including the owner, workers and worker associations can sort out the problems what they are facing. The discussion will be very clear and insightful where the owner can understand what they needs to do. But ILO needs to take initiatives first on approaching the owners and workers.	To show the tangible return in front of them including the economic return to the owners and government.	- The ROI for enterprises should be highlighted. - Evidence based documents on increase in employee productivity should help.
	17. For engaging ‘Good Quality Medical Staff (Doctors/Nurses)’, how can the following institutions support Factory Owners:												BGMEA, MOHFW, DIFE needs to work jointly.	BGMEA, MOHFW, DIFE needs to work jointly.		- Advocacy can be attempted with the ministries. - Entities that are working with policies can play significant roles.
	a. Ministry of Health & Family Welfare	No comments				can extened support				✓ - Ministries can reinforce DGHS on preparing guidelines			yes	Yes	MOHFW need to acknowledged this	yes
	b. Directorate General Health Service	No comments	The effective referral initiative should be come from the DGHS.	DGHS can arrange ToT for Existing doctors and nurses working at RMG factories regarding OSH Handbook.	DGHS can arrange ToT for Existing doctors and nurses working at RMG factories regarding OSH Handbook.	can extened support		DGHS can arrange ToT for Existing doctors and nurses working at RMG factories regarding OSH Handbook.	they may help	✓ - DG office can reinforce motivation by providing support in registration, curriculum development, etc. Modules can be developed for medical professionals with knowledge specific to this sector.			yes	yes		yes
	c. BGMEA and BKMEA	They may consider	BKMEA/ BGMEA can take financial steps for the RMG sectors. To encourage more they can do award basis program each year for the services.			we are already doing	They need to extend help	They should help on sourcing and appointment	they can do more	✓ - BGMEA & BKMEA can launch an institute of OSH, graduates from there can be promises for jobs and scholarships in this sector with a contractual condition.	- Can support better if more focused research is invested in this.		yes	yes	BGMEA/ BKMEA can be change maker and here to onboard
	d. Medical Colleges	No comments										✓- By introducing modules that are specific to occupational training.
	e. Nursing Colleges	No comments										✓- By introducing modules that are specific to occupational training.
	f. Others (If any)				WHO also can help to develop training modules regarding OSH.	DIFE	DIFE	DIFE		Ministry of Social Welfare	- General health service, mental health service, these components are not present in comprehensive forms.	Other training organizations, training potential professionals practically and not just theoretically.	DIFE	DIFE		Entities that are working with related policies
	18. For provision of ‘Good Quality Medical Supplies in Enterprise Clinics’, how can the following institutions support the factory owners:				ILO, MoLE, MOWFA, BGMEA & BKMEA need to work together to include such issues in government sector programs.						No comments				No comment
	a. Ministry of Health & Family Welfare	No comments		No comments	yes	yes	They May consider		Yes	yes		yes	-	-
	b. Directorate General Health Service	No comments	They may consider	Not possible with existing practices	yes	yes	They May consider		Yes	yes		yes	-	-
	c. BGMEA and BKMEA	They may consider	They may consider		yes	owners are already doing	They should do more	Bgmea and Bkmea can distribute good quality medical supplies by sourcing from producers.	Yes	yes			-	-		- By fulfilling their own agenda/requirements regarding workers’ welfare.
	d. Pharmaceutical Companies	No comments	They may consider		yes	they may consider				- Pharmaceuticals can collaborate with the enterprise clinic. They can provide the medicine as donation/ CSR		- By offering necessary supplies at subsidized costs, which can be achieved by forming relevant partnerships.	The pharmaceuticals company can reduce the MRP of the Medicines. If the medicine costs are high the owner can able to follow the copay model with the workers.	pharmaceuticals company can provide medicines at reduced MRP		- By working together with pharmaceuticals
	e. Large Medical stores	No comments											-	-
	f. Others				MoLE	DIFE	MoSocial welfare						-	-
	19. For ‘regular training of Doctors & Nurses’, how can the following institutions support the Factory Owners:						Yes				No comments				No comment	No comments
	a. Ministry of Health & Family Welfare	No comments										- This can be defined as a specialized area/career path for doctors. Related modules/courses can be offered at relevant institutes.	yes
	b. Directorate General Health Service	No comments	The DGHS should take the initiatives, where the doctors & nurses get proper training along with practical overviews. This is a must needed thing for the Doctors and Nurses. The training can be 15 days or Three (3) months, but this training is needed.	DGHS can provide TOT once a year for doctors and nurses, paramedics at RMG factories	✓ DGHS can arrange ToT for Existing doctors and nurses working at RMG factories regarding OSH Handbook.	yes	yes	✓ DGHS can arrange ToT for Existing doctors and nurses working at RMG factories regarding OSH Handbook.	yes			- This can be defined as a specialized area/career path for doctors. Related modules/courses can be offered at relevant institutes.	yes
	c. BGMEA and BKMEA	They may consider				yes	yes	✓ BGMEA and BKMEA can arrange for regional trainings.	yes	- BGMEA/ BKMEA can establish one institute and provide all the training.			yes
	d. Medical and Nursing Colleges	No comments					they should arrange training sessions for existing clinical staffs, zone wise					- This can be defined as a specialized area/career path for doctors. Related modules/courses can be offered at relevant institutes.	yes
	e. Private Sector Training Institutions									yes, To make it flexible for every doctor, private sector can take a step towards the training.			yes
	f. Others	through “national occupational health and safety related research and training institute, Rajshahi” by DIFE in future.			WHO can help to develop training modules regarding OSH.	DIFE, DGFP	DIFE						DIFE will monitor if the training is properly happening or not.	DIFE will monitor if the training is properly happening or not.
	20. Can a number of factories in the same area establish a joint ‘Enterprise Clinic/hospital’ instead of establishing individual facilities in each Factory?	Yes, they should. Previously DIFE proposed the same for day care centers at RMG factories.	Yes, It is possible. At the same time there is a challenge that brings the cost management. However,joint venture is possible but all the owners need to work precisely with their perspective.	No comments	Yes. Community clinic is the following role models for the community from the past. But it can be work for all the small and medium size RMGs.	Yes, Satellite clinic is also be an option here. A registration option should be inside where the workers will be registered and it will help the government, buyers, owners and central fund to execute the budget which they provide.	It is possible	No. Accesibility is the challange here. owners may not allow workers to go outside during working hours.	Yes	Yes	Yes	Yes	Yes	Yes.	No comment	No comments
	21. Can factories outsource their ‘Enterprise Clinics’ with an affordable price agreement to?		No, It won’t be effective. As the enterprise clinic should be control under the RMG sectors, Otherwise, it will hamper the accountability.								No comments		No comment			No comments
	a. Government Hospital in the area	No		No scope at present as special need.	NCD centers of Upazila health complex is there	Few industries are doing so		No	Yes	Yes, MoU can be signed		It is possible but a lot of improvement might be required for success.		Owner of the Garments should take initiatives and collaborate with the government.	Yes
	b. Reputable private clinics in the area	yes		Maybe possible for Reputable private clinics around the factory area.	Possible	We are already doing so	yes	Yes	yes			Yes		yes	Yes
	c. Any other institution	Companies providing Digital Health								CRP					Online consultancy is the suitable option here. Digital services would be great .
	22. Can factories adopt ‘Digital Health Services’ to use online health counseling?	Yes, Online health counseling and health consultation also.	Yes, It can be possible to adopt digital health services to use for online health counseling. Intially the telemedicine can be a challenge to accomplish the digital health service. But the consultancy in person can be effective more.	Yes	Yes, Highly Acceptable for the digital health services to use online health counseling and consultation.	Yes, cost of digital health services need to optimize	Yes, it is highly needed.	Yes, For health counseling and primary care also if assisted telemedicine is included.	Yes	Yes	- Digital health services can be one of the major paths to access primary healthcare. However, traditional channels need to work together with digital platforms for making it holistic. - There can be health cards, and a centrally maintained database of information. - Localized service is necessary too. - Gender accessibility can be an issue for digital platforms.	- Complete digitization of the process is not likely to be effective. However, partial integration at different steps can be	Yes	Yes, its highly needed.	Yes	Yes this has a lot of promises. However, appropriate training and motivation must be provided.
	23. Any other recommendations on making ‘Model Enterprise Clinic’ affordable for Employers?	No	Following the CoPay model for each staff member and employer is recommended.	No comments	If MoLE and MOHFW bring OSH along with primary health care service at factories within their sector programs then employers can benefit from having clinical staffs, medical equipment/ medicine supplies through government program.	No comments	No	Incentive & Recognition for employers.	No	No	No	- Going through cross-country references can be helpful.	No	No	Should provide incentives to owners	No comments

## Sheet: Sustainability_priority_factors
KPI	Stakeholders	Details	Importants	Remark
Affordability	DOL	yes it's possible. In this case employee can be played a major role. Owner(60%) staff(40%)	7
	CRP	Not affordable for long term diseases. to make it sustainable all the rehabilitated service, screening services should be inside the clinic. Atleast basic parts.	5
	RAPID	Government Stakeholder needed, government hospital can play a vital role.	7
	SwissContact	employer will take all the cost A co-pay model can be easily build	5
	GSK	yes for workers also owners are highly appreciated.	5
	BKMEA
	DIFE	Affroadable for Large and medium size	5
	DGHS	No coments	1
	BSR	Yes	4
	Primark	providing example of others and provide guideline to improve their income.	4
	NCCWE	Need employers, Government, Employee	5
	FGW	It is affordable to establish,need awareness.	2
	WHO	Its affordable. Need to mitigate the challanges with operational cost.	5
Regular Training of doctor and nurse	DOL	DGHS should take the initiative to provide training of doctor and nurse	6
	CRP	BGMEA/BKMEA should establish university and provide training	3
	RAPID	No comments	1
	SwissContact	No comment	1
	GSK	Yes highly needed	7
	DIFE	through “national occupational health and safety related research and training institute, Rajshahi” by DIFE in future.	3
	DGHS	DGHS can provide TOT once a year to doctors and nurses, paramedics
	BSR	DGHS can arrange ToT for doctor and nurse	3
	Primark	DGHS,BGMEA & BKMEA should include training	3
	NCCWE	DGHS,BGMEA & BKMEA, DIFE can monitor.	5
	FGW	DIFE will monitor if the training is properly happening or not.	5
	WHO	DGHS can arrange ToT for Existing doctors and nurses working at RMG factories regarding OSH Handbook.WHO also can help to develop training modules regarding OSH.	3
Good Quality Medical supply	DOL	For good quality medical supply DGHS, BGMEA,BKMEA may support Factory Owner, Pharmaceutical companies	5
	CRP	Training should be provided by MOHFW and DGHS . Pharmaceuticals will link with enterprise clinic	3
	RAPID	No comment	1
	SwissContact	No comment	1
	GSK	No Comment	1
	DIFE	DGHS should take the initiative. Other no comment	3
	DGHS	No coments
	BSR	Bgmea and Bkmea can distribute good quality medical supplies by sourcing from producers.	2
	Primark	MOHFW,DGHS and BGMEA & BKMEA can provide.	5
	NCCWE	Parmaceutical companies can provided this.and reduce the cost	2
	FGW	pharmaceuticals company can provide medicines at reduced MRP	4
	WHO	ILO, MoLE, MOWFA, BGMEA & BKMEA need to work together to include such issues in government sector programs, pharmaceutical Companies	4
Motivation of factory Owner	DOL	To show their production, To keep records of worker's condition	3
	CRP	Less Invest more outcome through workers contribution	2
	RAPID	Public private partnership ,if serveral Pharmaciticals involved in it	3
	SwissContact	to show tangible return take into the account	5
	GSK	Depend on mindset of factory one Investment of 1 taka can bring 3.5 taka in return	1
	DIFE	Better health workers ensure better productivity, worker's high satisfaction	5
	DGHS	No comments
	BSR	Several cost of optimization to maintain	3
	Primark	provide example of others, Provide guideline of to improve their income	3
	NCCWE	Depend on mindset of factory one Investment of 1 taka can bring 3.5 taka in return	3
	FGW	showing the benefits of the health facility,joint discussion with others,	5
	WHO	Share the benefits of EC in terms of numbers ( services/ financial outcome)	4
Digital Health Service	DOL	yes,it can possible adopt digital health service.to use online health counselling initially telemedicine can be challenging	3
	CRP	online health counselling not effective but physical counselling would be.	2
	RAPID	Telemedicine service. But it doesn't fill the support, but need app develop	5
	SwissContact	more focus on physical like doctor and so	4
	GSK	Yes highly needed	7
	DIFE	Yes online counselling and health Consultation also	5
	DGHS	YES	3
	Primark	YES	3
	NCCWE	Yes. It highly needed	7
	FGW	Yes, its highly needed.	7
	WHO	Yes, Highly Acceptable for the digital health services to use online health counseling and consultation.	7
	BSR		6

## Sheet: DIFE
Organization Name: DIFE Date: Participants List: Introduction On behalf of CMED and ILO, we thank you for agreeing to share your inputs with us for improving the ‘Enterprise Clinics’ in factories. According to Bangladesh Labour Rules (Rules 77 and 78), Employers have to establish an ‘Enterprise Clinic’ to provide healthcare support to its workers. Depending on size of factories, a different level…
Part-1: General Questions:
Question	Answer
What is your general feeling about the existing services provided by Enterprise Clinics in factories?	1) Small sized factories are more in need of assistance when it comes to complying with laws and regulations. 2) Recruitment and retention of doctors within premises is a major challenge.
What are the major benefits of Enterprise Clinics – both for workers and employers?	Major benefits for Workers: 1) Ensuring social safety net comprising OSH 2) Less costly general healthcare Major benefits for Employers: 1) Lower employee absenteeism 2) Higher rates of worker retention 3) Higher productivity 4) Lower rates of monetary compensation resulting from a lower rate of illness and accident
What are the major challenges of Enterprise Clinics?	1) Ensuring the availability of clinical staff. 2) No adequate health record 3) high operational cost.
Part-2: Model Enterprise Clinic:
Question	Answer
In your opinion, what type of services should be provided by Enterprise Clinics for: a. General healthcare for workers b. Prevention against diseases and injuries c. Acute Injury management d. Post-injury rehabilitation e. Women-specific health issues f. Mental Health	a) Yes b) Yes c) Yes d) No e) yes
What type of medical equipment should be available in Enterprise Clinic? a) For diagnosis: b) For disease treatment: c) For injury management: d) For post-injury management: e) For women’s health issues:	a.yes b.no c. yes d. no e. yes
What type of environment should be there in Enterprise Clinic?	The kind of physical environment that has been required by existing labour law. Standards for light and ventilation must be met.
What should be the minimum standard of staff in Enterprise Clinic? a) Doctors (male, female) b) Nurses (male, female) c) Others	a) Doctors: According to labor law b) Nurses: According to labor law c) Others: as per labor law
What type of medicines should be provided in Enterprise Clinic?	As per labour Law
Should ‘Enterprise Clinic’ have a referral system with nearest secondary & tertiary hospital?	Yes
Should there be an ambulance service to transfer serious patients to hospital?	Yes
Should ‘Enterprise Clinics’ organize awareness raising events for Workers on health, hygiene, nutrition, mental health, women’s health issues, etc?	Yes
Should ‘Enterprise Clinics’ provide individual and group counselling to workers on health, hygiene, nutrition, mental health, women’s health issues, etc?	Yes
Should ‘Enterprise Clinics’ create awareness on ‘Occupational Safety & Health’?	Yes
Should ‘Enterprise Clinics’ maintain a computerized record of each Worker for medical history?	Yes, It should be consider as best practice.
Part-3: Sustainability of Model Enterprise Clinics (EC)
Question	Answer
Do you think a ‘Model Enterprise Clinic’ will be financially affordable for employers? What elements do you think are not affordable?	It is affordable for large and medium-sized industries, but small-sized industries face challenges. Operational costs are high, including doctors’ remuneration, medicines beyond OTC, and bill payments to referral centers, among others.
What can be the most important elements to motivate factory owners to implement a Model EC?	1) Better health of workers ensure better productivity and profit. 2) Less abstinence, 3) Retention of experience workers due to high satisfaction. 4) Ensure compliance, regulatory and buyer requirements.
For engaging ‘Good Quality Medical Staff (Doctors/Nurses)’, how can the following institutions support Factory Owners: a) Ministry of Health & Family Welfare: b) Directorate General Health Service: c) BGMEA and BKMEA: d) Medical Colleges / Nursing Colleges: e) Medical Colleges / Nursing Colleges: f) Others (If have)	1) No comment 2) No comments 3) They may consider 4) No comments 5) No comments
For the provision of ‘Good Quality Medical Supplies in Enterprise Clinics’, how can the following institutions support the factory owners: a. Ministry of Health & Family Welfare: b. Directorate General Health Service: c. BGMEA and BKMEA: d. Pharmaceutical Companies: e. Large medical stores: F. Others: institutions support the Factory Owners:	a) No comments b) No comments c) They may consider d) No comments e) No comments
For ‘regular training of Doctors & Nurses’, how can the following institutions support the Factory Owners: a) Ministry of Health & Family Welfare: b) Directorate General Health Service: c) BGMEA and BKMEA: d) Medical and Nursing Colleges: e) Private Sector Training institutions: f) Others:	a) No comments b) No comments c) They may consider d) No comments e) Other: through “national occupational health and safety related research and training institute, Rajshahi” by DIFE in future.
Can a number of factories in the same area establish a joint ‘Enterprise Clinic/hospital’ instead of establishing individual facilities in each Factory?	Yes, they should. Previously DIFE proposed the same for day care centers at RMG factories.
Can factories outsource their ‘Enterprise Clinics’ with an affordable price agreement to? a) Government Hospital in the area: b) Reputable private clinics in the area c) Any other institution:	a) No b) Yes c) Companies providing digital health.
Can factories adopt ‘Digital Health Services’ to use online health counseling?	Yes, Online health counseling and health consultation also.
Any other recommendation on making ‘Model Enterprise Clinic’ affordable for Employers?	No

## Sheet: DoL
Organization Name: Department of Labour(DoL) Date: Participants List: Dr. Alpana Sarker Introduction On behalf of CMED and ILO, we thank you for agreeing to share your inputs with us for improving the ‘Enterprise Clinics’ in factories. According to Bangladesh Labour Rules (Rules 77 and 78), Employers have to establish an ‘Enterprise Clinic’ to provide healthcare support to its workers. Depending …
Part-1: General Questions:
Question	Answer
What is your general feeling about the existing services provided by Enterprise Clinics in factories?	1) The existing services need to be upgraded with digitalization. 2) On this point use of early screening tools at Enterprise clinics will be very beneficial. 3) Raising general awareness about the importance of early screening to prevent major health problems is crucial.
What are the major benefits of Enterprise Clinics – both for workers and employers?	1) Both workers and employers will be benefited. 2) As the workers can able to take all the benefit of the enterprise clinic with their own responsibility. From this place they can also be guided for any referral hospital where they go for their further checking. 3) However, the early screening will help the workers most to detect health problems and remedice 4)The Enterprise Clinic should be tag…
What are the major challenges of Enterprise Clinics?	1) The key major challenge of enterprise clinics is the referral problem. As there is no functional referral services at any enterprise clinic on any RMG factories. Also need to provide an OHS-related guidance for clinical staffs, admin staffs and workers.
Part-2: Model Enterprise Clinic:
Question	Answer
In your opinion, what type of services should be provided by Enterprise Clinics for: a. General healthcare for workers b. Prevention against diseases and injuries c. Acute Injury management d. Post-injury rehabilitation e. Women-specific health issues f. Mental Health	In my opinion, Every service related to health needs to incorporate in this enterprise clinic in all RMG sectors. It will help all the employers and owners to gained the trust that they can get all the service in their workplace. a. Yes b. Yes c. Yes d. Yes e. Yes f. Yes
What type of medical equipment should be available in Enterprise Clinic? For diagnosis: a) For disease treatment: b) For injury management: c) For post-injury management: d) For women’s health issues:	Relevant to every hospital/ clinic, all the equipments are needed for enterprise clinic. The main focus should be the doctors, However the main issue arise when we talkes about doctors presence. We must have to ensure the doctors presence. The doctors salary needs to be handsome salary, and all other benefits. so that they can get encouragement for the job. a) Yes b) Yes c) Yes d) Yes e) Yes
What type of environment should be there in Enterprise Clinic?	The main focus should be doctors availability in the enterprise clinic as per BLA and BLR
What should be the minimum standard of staff in Enterprise Clinic? a) Doctors (male, female) b) Nurses (male, female) c) Others	a) In the very first, needs to ensure the staffs handsome salary and benefits towards encouraging to work. If possible, also provides the living place and other facilities to them. b) In the very first, needs to ensure the staffs handsome salary and benefits towards encouraging to work. If possible, also provides the living place and other facilities to them.
What type of medicines should be provided in Enterprise Clinic?	1) Essential Service Package (ESP) medicines should be provided 2) If the antibiotic medicine prices are not affordable for the employees, the owners should provide the medicines 3) If it becomes a burden to the owners, atleast take the money from the employees like EMI system, So that they can complete the medicine course (Antibiotics/ Drugs for cronic care) .
Should ‘Enterprise Clinic’ have a referral system with nearest secondary & tertiary hospital?	1) Every enterprise clinic should have a referral system with their nearest secondary and tertiary hospital. 2) Also, need to involve the private hospitals if needed for certain areas where the government hospitals are unreachable.
Should there be an ambulance service to transfer serious patients to hospital?	It is not mandatory to have an ambulance of each indutry owns. For small and some medium rmg factories, it is not possible for them to maintain an ambulance. 24/7 on call ambulance service should procure.
Should ‘Enterprise Clinics’ organize awareness raising events for Workers on health, hygiene, nutrition, mental health, women’s health issues, etc?	Yes. The awareness raising is very important for the organization
Should ‘Enterprise Clinics’ provide individual and group counselling to workers on health, hygiene, nutrition, mental health, women’s health issues, etc?	Yes, It is very important. Somehow, It will help the workers to recover by discussion and caring all their problems.
Should ‘Enterprise Clinics’ create awareness on ‘Occupational Safety & Health’?	Yes, It is very important too.
Should ‘Enterprise Clinics’ maintain a computerized record of each Worker for medical history?	Yes, It is very important for them to maintain. Along with the digital dashboard and digital service for the Garments to monitor the records.
Part-3: Sustainability of Model Enterprise Clinics (EC)
Question	Answer
Do you think a ‘Model Enterprise Clinic’ will be financially affordable for employers? What elements do you think are not affordable?	Yes, it is possible for RMG sectors to provide Model Enterprise Clinic. Somehow, the initiative should be taken by the owners. But it can be a burden to the owners and some will not get courage to establish a model enterprise to their factories. It this case, the employer's contribution can be a major role in establishing the Model Enterprise Clinic. Atleast the owner should bear 60% of the cost …
What can be the most important elements to motivate factory owners to implement a Model EC?	In three (3) ways the owners can get motivated to establish model EC, 1. To show the output of their production. If the workers get some health problems, they cannot do their job, they can not deliver the products in time. 2. To show them in major cases, if they are absent they can also get the service from their facility. It’ll bring the encouragement to the workers to work for that place. So th…
For engaging ‘Good Quality Medical Staff (Doctors/Nurses)’, how can the following institutions support Factory Owners: a) Ministry of Health & Family Welfare: b) Directorate General Health Service: c) BGMEA and BKMEA: d) Medical Colleges / Nursing Colleges: e) Medical Colleges / Nursing Colleges: f) Others (If have)	b. The effective referral initiative should be come from the DGHS. c. BKMEA/ BGMEA can take financial steps for the RMG sectors. To encourage more they can do award basis program each year for the services.
For the provision of ‘Good Quality Medical Supplies in Enterprise Clinics’, how can the following institutions support the factory owners: a. Ministry of Health & Family Welfare: b. Directorate General Health Service: C. BGMEA and BKMEA: D. Pharmaceutical Companies: e. Large medical stores: F. Others: institutions support the Factory Owners:	B. They may consider C. They may consider D. They may consider
For ‘regular training of Doctors & Nurses’, how can the following institutions support the Factory Owners: a) Ministry of Health & Family Welfare: b) Directorate General Health Service: c) BGMEA and BKMEA: d) Medical and Nursing Colleges: e) Private Sector Training institutions: f) Others:	The DGHS should take the initiatives, where the doctors & nurses get proper training along with practical overviews. This is a must needed thing for the Doctors and Nurses. The training can be 15 days or Three (3) months, but this training is needed.
Can a number of factories in the same area establish a joint ‘Enterprise Clinic/hospital’ instead of establishing individual facilities in each Factory?	Yes, It is possible. At the same time there is a challenge that brings the cost management. However,joint adventure is possible but all the owners need to work precisely with their perspective.
Can factories outsource their ‘Enterprise Clinics’ with an affordable price agreement to? a) Government Hospital in the area: b) Reputable private clinics in the area c) Any other institution:	No, It won’t be effective. As the enterprise clinic should be control under the RMG sectors, Otherwise, it will hamper the accountability.
Can factories adopt ‘Digital Health Services’ to use online health counseling?	Yes, It can be possible to adopt digital health services to use for online health counseling. Initially the telemedicine can be a challenge to accomplish the digital health service. But the consultancy in person can be effective more.

## Sheet: DGHS
Organization Name: DGHS Date: Participants List: Introduction On behalf of CMED and ILO, we thank you for agreeing to share your inputs with us for improving the ‘Enterprise Clinics’ in factories. According to Bangladesh Labour Rules (Rules 77 and 78), Employers have to establish an ‘Enterprise Clinic’ to provide healthcare support to its workers. Depending on size of factories, a different level…
Part-1: General Questions:
Question	Answer
What is your general feeling about the existing services provided by Enterprise Clinics in factories?	NCDC of DGHS is not aware of existing services provided by enterprise clinics in factories
What are the major benefits of Enterprise Clinics – both for workers and employers?	No Comments
What are the major challenges of Enterprise Clinics?	No Comments
Part-2: Model Enterprise Clinic:
Question	Answer
In your opinion, what type of services should be provided by Enterprise Clinics for: a. General healthcare for workers b. Prevention against diseases and injuries c. Acute Injury management d. Post-injury rehabilitation e. Women-specific health issues f. Mental Health	a) General Healthcare service should be provided b) Prevention against diseases and injuries services should be provided c) Acute Injury management services should be provided in the enterprise clinic d) Post-Injury Rehabilitation services is not necessary e) Women-specific health issues services should be provided in the enterprise clinic f) Mental health service should be provided in the enterp…
What type of medical equipment should be available in Enterprise Clinic? a) For diagnosis: b) For disease treatment: c) For injury management: d) For post-injury management: e) For women’s health issues:	Workplace injury and general health care for workers Acute injury management , primary diagnosis of common illness and general healthcare for workers Acute injury management minor Primary and preventive care for reproductive health a)Workplace injury and generla health care for workers b) Acute injury management , primary diagnosis of common illness and general healthcare for workers c) Acute inj…
What type of environment should be there in Enterprise Clinic?	As per standard health clinic.
What should be the minimum standard of staff in Enterprise Clinic? a) Doctors (male, female) b) Nurses (male, female) c) Others	a) According to existing labor laws and rules for both doctors, nurses, paramedics etc, b) According to existing labor laws and rules for both doctors, nurses, paramedics etc.,
What type of medicines should be provided in Enterprise Clinic?	OTC, Supplements
Should ‘Enterprise Clinic’ have a referral system with nearest secondary & tertiary hospital?	Yes, DGHS is ready to provide service to them through NCD corner of Upazila Health Complexes.
Should there be an ambulance service to transfer serious patients to hospital?	No Comment
Should ‘Enterprise Clinics’ organize awareness raising events for Workers on health, hygiene, nutrition, mental health, women’s health issues, etc?	Yes
Should ‘Enterprise Clinics’ provide individual and group counselling to workers on health, hygiene, nutrition, mental health, women’s health issues, etc?	Yes
Should ‘Enterprise Clinics’ create awareness on ‘Occupational Safety & Health’?	Yes
Should ‘Enterprise Clinics’ maintain a computerized record of each Worker for medical history?	Yes, it may be considered as the best practice.
Part-3: Sustainability of Model Enterprise Clinics (EC)
Question	Answer
Do you think a ‘Model Enterprise Clinic’ will be financially affordable for employers? What elements do you think are not affordable?	No Comments
What can be the most important elements to motivate factory owners to implement a Model EC?	No Comments
For engaging ‘Good Quality Medical Staff (Doctors/Nurses)’, how can the following institutions support Factory Owners: a) Ministry of Health & Family Welfare: b) Directorate General Health Service: c) BGMEA and BKMEA: d) Medical Colleges / Nursing Colleges: e) Medical Colleges / Nursing Colleges: f) Others (If have)	2. DGHS can arrange ToT for Existing doctors and nurses working at RMG factories regarding OSH Handbook.
For the provision of ‘Good Quality Medical Supplies in Enterprise Clinics’, how can the following institutions support the factory owners: a. Ministry of Health & Family Welfare: b. Directorate General Health Service: c. BGMEA and BKMEA: d. Pharmaceutical Companies: e. Large medical stores: F. Others: institutions support the Factory Owners:	No Comments
For ‘regular training of Doctors & Nurses’, how can the following institutions support the Factory Owners: a) Ministry of Health & Family Welfare: b) Directorate General Health Service: c) BGMEA and BKMEA: d) Medical and Nursing Colleges: e) Private Sector Training institutions: f) Others:	B. DGHS can provide TOT once a year for doctors and nurses, paramedics at RMG factories
Can a number of factories in the same area establish a joint ‘Enterprise Clinic/hospital’ instead of establishing individual facilities in each Factory?	No comments
Can factories outsource their ‘Enterprise Clinics’ with an affordable price agreement to? a) Government Hospital in the area: b) Reputable private clinics in the area c) Any other institution:	a) No scope at present as special need. b) Maybe possible for Reputable private clinics around the factory area.
Can factories adopt ‘Digital Health Services’ to use online health counseling?	Yes
Any other recommendation on making ‘Model Enterprise Clinic’ affordable for Employers?	No Comments

## Sheet: WHO
Organization Name: WHO Date: Participants List: Introduction On behalf of CMED and ILO, we thank you for agreeing to share your inputs with us for improving the ‘Enterprise Clinics’ in factories. According to Bangladesh Labour Rules (Rules 77 and 78), Employers have to establish an ‘Enterprise Clinic’ to provide healthcare support to its workers. Depending on size of factories, a different level …
Part-1: General Questions:
Question	Answer
What is your general feeling about the existing services provided by Enterprise Clinics in factories?	There is significant Lack of Policy and definite Operation plan for the service provided by Enterprise Clinic in factories.
What are the major benefits of Enterprise Clinics – both for workers and employers?	Ensuring primary health care services along with OSH for workers. Better health of workers will ensure better productivity for employers.
What are the major challenges of Enterprise Clinics?	Challenges at policy level; Major stakeholders are not aligned regarding OSH and primary health care service delivery at factories. ILO, MoLE and MOWFA need to work together to include such issues in government sector programs. Challenges at operational level; Incorporation of existing primary health care services at government institutes along with existing health facilities within the factories…
Part-2: Model Enterprise Clinic:
Question	Answer
In your opinion, what type of services should be provided by Enterprise Clinics for: a. General healthcare for workers b. Prevention against diseases and injuries c. Acute Injury management d. Post-injury rehabilitation e. Women-specific health issues f. Mental Health	a) General healthcare for workers b) Prevention against diseases and injuries c) Acute Injury management d) Women- psecific health issues e) Mental Health
What type of medical equipment should be available in Enterprise Clinic? a) For diagnosis: b) For disease treatment: c) For injury management: d) For post-injury management: e) For women’s health issues:	a) For diagnosis: c)For injury management: e) For women's health issues:
What type of environment should be there in Enterprise Clinic?	Adequate light and ventilation separate consultancy rooms considering female workers' privacy.
What should be the minimum standard of staff in Enterprise Clinic? a) Doctors (male, female) b) Nurses (male, female) c) Others	a) Number of clinical stuffs availability should be according to number of employees/ workers at industry along with type of work. 24/7 coverage or 30 days coverage can be arranged through assisted telemedicine (Full Coverage of paramedic or nurse and partial coverage of doctor’s presence in person) b) Number of clinical stuffs availability should be according to number of employees/ workers at i…
What type of medicines should be provided in Enterprise Clinic?	OTC, Supplements
Should ‘Enterprise Clinic’ have a referral system with nearest secondary & tertiary hospital?	Yes. Information of referral service should be appropriately displayed at industry and also at referral center.
Should there be an ambulance service to transfer serious patients to hospital?	On call ambulance services should be available. These ambulance service can serve to carry patients from ec to referral center and during other accidents (Individual or Mass)
Should ‘Enterprise Clinics’ organize awareness raising events for Workers on health, hygiene, nutrition, mental health, women’s health issues, etc?	Yes, Industry should keep adequate visuals on hygiene, nutrition, mental health, women’s health issues to promote awareness.
Should ‘Enterprise Clinics’ provide individual and group counselling to workers on health, hygiene, nutrition, mental health, women’s health issues, etc?	Yes, Industry should keep adequate group session & Leaflet distribution through a yearly calender.
Should ‘Enterprise Clinics’ create awareness on ‘Occupational Safety & Health’?	Yes, Through Visuals, Group session & Leaflet distribution through a yearly calender.
Should ‘Enterprise Clinics’ maintain a computerized record of each Worker for medical history?	Yes. There should be one health record system for the workers, which will be monitored by looking after the diseases through the system. However, The system will connect to the MIS system. Also, The medicine and drugs disburse and use of the medicines can be tracked through the system.
Part-3: Sustainability of Model Enterprise Clinics (EC)
Question	Answer
Do you think a ‘Model Enterprise Clinic’ will be financially affordable for employers? What elements do you think are not affordable?	Its affordable. Need to mitigate the challanges with operational cost.
What can be the most important elements to motivate factory owners to implement a Model EC?	share the benefits of EC in terms of numbers ( services/ financial outcome)
For engaging ‘Good Quality Medical Staff (Doctors/Nurses)’, how can the following institutions support Factory Owners: a) Ministry of Health & Family Welfare: b) Directorate General Health Service: c) BGMEA and BKMEA: d) Medical Colleges / Nursing Colleges: e) Medical Colleges / Nursing Colleges: f) Others (If have)	b) DGHS can arrange ToT for Existing doctors and nurses working at RMG factories regarding OSH Handbook. f) WHO also can help to develop training modules regarding OSH.
For the provision of ‘Good Quality Medical Supplies in Enterprise Clinics’, how can the following institutions support the factory owners: a. Ministry of Health & Family Welfare: b. Directorate General Health Service: c. BGMEA and BKMEA: d. Pharmaceutical Companies: e. Large medical stores: F. Others: institutions support the Factory Owners:	ILO, MoLE, MOWFA, BGMEA & BKMEA need to work together to include such issues in government sector programs. a) Yes b) Yes c) Yes d) Yes e) No f) MolE
For ‘regular training of Doctors & Nurses’, how can the following institutions support the Factory Owners: a) Ministry of Health & Family Welfare: b) Directorate General Health Service: c) BGMEA and BKMEA: d) Medical and Nursing Colleges: e) Private Sector Training institutions: f) Others:	b) DGHS can arrange ToT for Existing doctors and nurses working at RMG factories regarding OSH Handbook. f) WHO also can help to develop training modules regarding OSH.
Can a number of factories in the same area establish a joint ‘Enterprise Clinic/hospital’ instead of establishing individual facilities in each Factory?	Yes. Community clinic is the following role models for the community from the past. But it can be work for all the small and medium size RMGs.
Can factories outsource their ‘Enterprise Clinics’ with an affordable price agreement to? a) Government Hospital in the area: b) Reputable private clinics in the area c) Any other institution:	No comments a) NCD centers of Upazila helath complex is there b) Possible
Can factories adopt ‘Digital Health Services’ to use online health counseling?	Yes, Highly Acceptable for the digital health services to use online health counseling and consultation.
Any other recommendation on making ‘Model Enterprise Clinic’ affordable for Employers?	If MoLE and MOHFW bring OSH along with primary health care service at factories within their sector programs then employers can benefit from having clinical staffs, medical equipment/ medicine supplies through government program.

## Sheet: BKMEA
Organization Name: BKMEA Date: Participants List: Farzana Sharmin, MD Zakaria Khaled, Fatema Tuz Zohra, Alamgir Hossain Introduction On behalf of CMED and ILO, we thank you for agreeing to share your inputs with us for improving the ‘Enterprise Clinics’ in factories. According to Bangladesh Labour Rules (Rules 77 and 78), Employers have to establish an ‘Enterprise Clinic’ to provide healthcare su…
Part-1: General Questions:
Question	Answer
What is your general feeling about the existing services provided by Enterprise Clinics in factories?	Almost all the factories, which are member of BKMEA which are following the BLA, BLR accordingly.
What are the major benefits of Enterprise Clinics – both for workers and employers?	1) Social Safety net for employees 2) Healthy and happy workers are asset of owners to ensure producitivity and business growth.
What are the major challenges of Enterprise Clinics?	1) There are compliance Issue but somehow depending on the buyers need and accordance to the labour law, the challenges are getting less. 2) Even if there is no full time doctor, with other alternatives such as paramedic, nurses are covering all the needs at the existing Enterprise Clinics.
Part-2: Model Enterprise Clinic:
Question	Answer
In your opinion, what type of services should be provided by Enterprise Clinics for: a. General healthcare for workers b. Prevention against diseases and injuries c. Acute Injury management d. Post-injury rehabilitation e. Women-specific health issues f. Mental Health	More over the services, the 3 things need to advocate in this side. And they are as below; Availability support 24 hours with telemedicine. Mitigate the digitalization cost. Telemedicine should be supported with specialized doctor. a) Yes b) Yes c) Yes d) No e) Yes f) No
What type of medical equipment should be available in Enterprise Clinic? For diagnosis: a) For disease treatment: b) For injury management: c) For post-injury management: d) For women’s health issues:	a) yes b) yes c) Yes d) No e) Yes
What type of environment should be there in Enterprise Clinic?	The enterprise clinic should be flexible with the workers mostly.
What should be the minimum standard of staff in Enterprise Clinic? a) Doctors (male, female) b) Nurses (male, female) c) Others	a) Doctors should be available or hired by the RMG sector. Full time b) Nurse, Paramedic should be well trained.
What type of medicines should be provided in Enterprise Clinic?	OTC Drugs .
Should ‘Enterprise Clinic’ have a referral system with nearest secondary & tertiary hospital?	Yes
Should there be an ambulance service to transfer serious patients to hospital?	24/7 on call ambulance service is needed.Somehow the big RMG has their own but for the small and medium an joint venture will be workable
Should ‘Enterprise Clinics’ organize awareness raising events for Workers on health, hygiene, nutrition, mental health, women’s health issues, etc?	Yes, Hygiene awareness, nutrition awareness, menustreal awareness and other counseling should be incorporated in the EC.
Should ‘Enterprise Clinics’ provide individual and group counselling to workers on health, hygiene, nutrition, mental health, women’s health issues, etc?	Yes, there should be one where the workers can get a proper understanding for their counselling and so on.
Should ‘Enterprise Clinics’ create awareness on ‘Occupational Safety & Health’?	Yes
Should ‘Enterprise Clinics’ maintain a computerized record of each Worker for medical history?	Yes
Part-3: Sustainability of Model Enterprise Clinics (EC)
Question	Answer
Do you think a ‘Model Enterprise Clinic’ will be financially affordable for employers? What elements do you think are not affordable?	Yes. Copay model might be integrate to make it sustain.
What can be the most important elements to motivate factory owners to implement a Model EC?	1) Copay model results can motivate owners by showing them the existing examples. 2) Health records helps to make the decision. 3) Also the digital record service towards the owners able to make a good decision and develop their business more and pro active with workers situation.
For engaging ‘Good Quality Medical Staff (Doctors/Nurses)’, how can the following institutions support Factory Owners: a) Ministry of Health & Family Welfare: b) Directorate General Health Service: c) BGMEA and BKMEA: d) Medical Colleges / Nursing Colleges: e) Medical Colleges / Nursing Colleges: f) Others (If have)	1) can extened support 2) can extened support 3) We are already doing 4) No comments 5) No comments 6) DIFE
For the provision of ‘Good Quality Medical Supplies in Enterprise Clinics’, how can the following institutions support the factory owners: a. Ministry of Health & Family Welfare: b. Directorate General Health Service: c. BGMEA and BKMEA: d. Pharmaceutical Companies: e. Large medical stores: F. Others: institutions support the Factory Owners:	a) Yes b) Yes c) Owners are already doing d) They may consider F. DIFE
For ‘regular training of Doctors & Nurses’, how can the following institutions support the Factory Owners: a) Ministry of Health & Family Welfare: b) Directorate General Health Service: c) BGMEA and BKMEA: d) Medical and Nursing Colleges: e) Private Sector Training institutions: f) Others:	B. Yes C. Yes F. DIFE, DGFP
Can a number of factories in the same area establish a joint ‘Enterprise Clinic/hospital’ instead of establishing individual facilities in each Factory?	Yes, Satellite clinic is also be an option here. A registration option should be inside where the workers will be registered and it will help the government, buyers, owners and central fund to execute the budget which they provide.
Can factories outsource their ‘Enterprise Clinics’ with an affordable price agreement to? a) Government Hospital in the area: b) Reputable private clinics in the area c) Any other institution:	a) Few industries are doing so b) We are already doing so
Can factories adopt ‘Digital Health Services’ to use online health counseling?	Yes, cost of digital health services need to optimize
Any other recommendation on making ‘Model Enterprise Clinic’ affordable for Employers?	No comments

## Sheet: GSK
Organization Name: GSK Date: Participants List: Dr. A K M Rezaul Haque, Ferdous Kabir Introduction On behalf of CMED and ILO, we thank you for agreeing to share your inputs with us for improving the ‘Enterprise Clinics’ in factories. According to Bangladesh Labour Rules (Rules 77 and 78), Employers have to establish an ‘Enterprise Clinic’ to provide healthcare support to its workers. Depending on…
Part-1: General Questions:
Question	Answer
What is your general feeling about the existing services provided by Enterprise Clinics in factories?	The current situation in factories for enterprise clinic is poor. Some garments have lots of workers but they dont have any medical center along with the equipments. So this side can be better if the steps taken properly.
What are the major benefits of Enterprise Clinics – both for workers and employers?	In a major sector of enterprise clinic, they can use the benefits of having enterprise clinic as a social audit. They can raise their impacts, challenges and problems through the enterprise clinics. It can also helps the employees to understand their needs and situation to take particular services to better their lifes.
What are the major challenges of Enterprise Clinics?	This depends on the Owners to mind to establish the enterprise clinic. However, it can be solved only if the owners want. 2nd I can say the quality of the service. 3rd the buyers requirement. If the buyers only look for their production, it is a major challenge too.
Part-2: Model Enterprise Clinic:
Question	Answer
In your opinion, what type of services should be provided by Enterprise Clinics for: a. General healthcare for workers b. Prevention against diseases and injuries c. Acute Injury management d. Post-injury rehabilitation e. Women-specific health issues f. Mental Health	All the health related services needs to provide in the enterprise clinic. Along with all the medical health care services, we also needs to focus on the woman harassment issues, to mitigate it on enterprise clinic.
What type of medical equipment should be available in Enterprise Clinic? For diagnosis: a) For disease treatment: b) For injury management: c) For post-injury management: d) For women’s health issues:	All the equipments relevant to medical colleges and clinics
What type of environment should be there in Enterprise Clinic?	The environment should be hygienic. However needs to be more careful with the woman harassment problems.
What should be the minimum standard of staff in Enterprise Clinic? a) Doctors (male, female) b) Nurses (male, female) c) Others	Atleast there should a nurse and paramedic with proper training
What type of medicines should be provided in Enterprise Clinic?	All kind of necessary medicines. (OTC)
Should ‘Enterprise Clinic’ have a referral system with nearest secondary & tertiary hospital?	Yes, it is highly needed so that they can get proper treatment.
Should there be an ambulance service to transfer serious patients to hospital?	Yes
Should ‘Enterprise Clinics’ organize awareness raising events for Workers on health, hygiene, nutrition, mental health, women’s health issues, etc?	Yes, highly needed to have a counselling part in the Enterprise Clinic. However needs to be more careful with the woman harassment problems
Should ‘Enterprise Clinics’ provide individual and group counselling to workers on health, hygiene, nutrition, mental health, women’s health issues, etc?	Yes, highly needed to have a counselling part in the Enterprise Clinic.
Should ‘Enterprise Clinics’ create awareness on ‘Occupational Safety & Health’?	Yes, They should create awareness on Occupational Safety and Health.
Should ‘Enterprise Clinics’ maintain a computerized record of each Worker for medical history?	Yes, it may be considered as the best practice.
Part-3: Sustainability of Model Enterprise Clinics (EC)
Question	Answer
Do you think a ‘Model Enterprise Clinic’ will be financially affordable for employers? What elements do you think are not affordable?	Yes, But the involvement for the owners are highly appreciated. Also to raise the problems and issues through awareness can be beneficial to employers to take health services from their own workplace.
What can be the most important elements to motivate factory owners to implement a Model EC?	At the very first, from our experience, is the mindset of the factory owner. However, their one investment to of 1 taka towards workers health can bring 3.5 taka in return to them, through the workers working hour.
For engaging ‘Good Quality Medical Staff (Doctors/Nurses)’, how can the following institutions support Factory Owners: a) Ministry of Health & Family Welfare: b) Directorate General Health Service: c) BGMEA and BKMEA: d) Medical Colleges / Nursing Colleges: e) Medical Colleges / Nursing Colleges: f) Others (If have)
For the provision of ‘Good Quality Medical Supplies in Enterprise Clinics’, how can the following institutions support the factory owners: a. Ministry of Health & Family Welfare: b. Directorate General Health Service: c. BGMEA and BKMEA: d. Pharmaceutical Companies: e. Large medical stores: F. Others: institutions support the Factory Owners:
For ‘regular training of Doctors & Nurses’, how can the following institutions support the Factory Owners: a) Ministry of Health & Family Welfare: b) Directorate General Health Service: c) BGMEA and BKMEA: d) Medical and Nursing Colleges: e) Private Sector Training institutions: f) Others:	Yes highly needed.
Can a number of factories in the same area establish a joint ‘Enterprise Clinic/hospital’ instead of establishing individual facilities in each Factory?	It is possible, but it could be a challenge, as all the workers with their families want to take the health service. Some factories will think that can create trouble to maintain all the patients who came to take the service if the enterprise clinic established in a particular RMG sector. For that they need a place to fix.
Can factories outsource their ‘Enterprise Clinics’ with an affordable price agreement to? a) Government Hospital in the area: b) Reputable private clinics in the area c) Any other institution:	b) Yes
Can factories adopt ‘Digital Health Services’ to use online health counseling?	Yes, It is highly needed
Any other recommendation on making ‘Model Enterprise Clinic’ affordable for Employers?	No

[truncated: 7 more sheets: BSR, Premark, CRP, RAPID, NCCWE, FGW, SwissContact]
