# Supplementary material
Source: Research Square preprint supplement (doi:10.21203/rs.3.rs-8598685/v1)
Supplement: Supplementary file 2 [file a9a4639d2fcd1c014fae7b42.xlsx]

## Sheet: Pilot Implementation data
	S/N	Name of Factory	Total Employees	EC type	Trainers	Name & Description of Elements	Category	Compliance Level	Action plan
	1	Donglion Fashion (BD) Ltd	1544	4	Mr. Mitu Basak, Saber Al Tarek	3 (B) 1.50 meters of the walls from ground were not impervious	Infrastructure	Available but need improvement	Tiles/waterproof paint/other suitable maneuvers will be incorporated
						4 (A) Bio medical Waste management through four colour coded bins (black, yellow, green and red) were not available	Utilities	Not Yet Available	4 different color coded bin will be added
	2	Aboni Knitwear Limited	3500	5	Mr. Mitu Basak, Saber Al Tarek	4 (A) Bio medical Waste management through four colour coded bins (black, yellow, green and red) were not avilable	Utilities	Not Yet Available	Four color coded bin will be implemented
						8 (A) 1 patient Examination Bed was not avialable	Furniture	Available but need improvement	Need to implement 1 patient examination bed
	3	Afiya Knitwear ltd	700	3	Mr. Mitu Basak, Saber Al Tarek	3 (C) Cross Air Ventilation was not available	Infrastructure	Available but need improvement	Exhaust Fan will be implement in the EC
						4 (A) Bio medical Waste management through four colour coded bins ( black, yellow, green and red) were not available	Utilities	Not Yet Available	4 different colour coded bin will be implement
						5 (H) Fitness during dangerous operation register was not maintained	Health services	Available but need improvement	EC doctor will maintain the register
						9 (A) 1 coated pot for hot and cold water was not available	Equipment	Available but need improvement	1 coated pots for hot and cold water
	4	EMS Apparels Ltd	1400	4	Mr. Mitu Basak, Saber Al Tarek	4 (A) 3 out of 4 color coded waste bin were available	Utilities	available but need improvement	Black colour bin will be implemented
						9(A) 1 coated pots for hot and cold water, 6 hand towels, 1 tray, 1 electric hand torch were not available	Equipment	Available but need improvement	Coated pots, hand towels, 1 tray and 1 electric torch will be in the EC
						10 (A) only Ointments for eyes was not available	Medicine and Consumables	Available but need improvement	Ointment for eyes will be in the EC
	5	Southern Knitwear	1250	4	Mr. Mitu Basak, Saber Al Tarek	2 (A) Boiler unit is situated just infront of the EC created difficulties	Location	Available but need improvement	They have already planned to relocate the EC
						4 (A) Bio medical Waste management through four colour coded bins (black, yellow, green and red) were not avilable	Utilities	Available but need improvement	4 colour coded bin will be implemented
						8 (A) 1 Wheelchair was not available	Furniture	Available but need improvement	1 Wheelchair will be arranged in the EC
						9 (A) 1 coated pots for hot and cold water, 1 kettle for boiling water, 1 Pair of artery forceps, 4 trays, 2 glass pots, several hypodermic syringes, 1 electric hand torch, Eyewash equipment were not available	Equipment	Available but need improvement	Coated pots, kettle, artery forceps, 2 trays, 1 glass pot, hypodermic syringes, 1 electirc Hand torches, Eyeswash equipment- all the needed things will be implemented
						10 (A) Ointment for eyes was not available	Medicine and Consumables	Available but need improvement	Ointment for eyes- will be implemented in the EC
	6	Bea-con Knitwear Ltd.	2560	4	Mr. Hasan Muhammad Shibli, Jakir Hossain	4 (A) Bio medical Waste management through four colour coded bins (black, yellow, green and red) were not avilable	Utilities	Not available	Four color-coded waste bin need to arrange
						10(B) Updated list of expiry medicines, consumables, equipment, in addition relevant materials replaced one month before expire of them	Medicine & Consumables	Not available	Will maintain an expiry medicine list
	7	Knit Concern Ltd	5625	6	Mr. Md. Harunur Rashid, Jakir Hossain	N/A	N/A	N/A	N/A
	8	Fariha Knitex Ltd	6500	6	Mr. Md. Harunur Rashid, Jakir Hossain	03 (I) Room for minor surgery and dressing was not available	Infrastructure	Available but need improvement	Will maintain room for minor surgery and dressing
						4 (A) Bio medical Waste management through four colour coded bins (black, yellow, green and red) were not avilable	Utilities	Available but need improvement	Black color-coded bin need to arrange
						11(A) 1 paramedic/dresser instead of 2 was available	Human Resources	Available but need improvement	One paramedic/dresser to be recruited
	9	Wavetex Apparels Ltd	525	4	Mr. Hasan Muhammad Shibli, Jakir Hossain	01 (A) The EC was seem congested	Size	Available but need improvement	Suggested to rearrange furnitures to best fit and to best usage of space
						4 (A) Bio medical Waste management through four colour coded bins (black, yellow, green and red) were not avilable	Utilities	Available but need improvement	Four color-coded bin need to arrange
						8 (A) 1 Wheelchair was not available	Furniture	Available but need improvement	1 Wheelchair will be arranged in the EC
						09(A) - 1 coated pot for hot and cold water - 6 hand towels - 3 trays above equipments was not available	Equipments	Available but need improvement	Available but need improvement
						10 (A) TT Vaccine at EC was not available	Medicine & Consumables	Available but need improvement	TT Vaccine for EC shall be arranged
						10 (B) Not maintain an expiry medicine list as regular	Medicine & Consumables	Available but need improvement	Will maintain an expiry medicine list
	10	Chorka Textile Ltd	5700	6	Mr. Mitu Basak, Amzad Hossain & Mustafizur Rahman	4 (A) 4 waste bins was there without color coded	Utilities	Available but need improvement	Bins to be colored accordingly
						9 (A) 6 hand towels 4 trays 1 electric hand torch was not available	Equipments	Available but need improvement	Appropriate numbers of hand towels, trays, and electric hand torch to be arranged
	11	RS Composite	2250	4	Mr. Hasan Muhammad Shibli, Jakir Hossain	4 (A) 3 out of 4 color coded wasted bin was available	Utilities	Available but need improvement	1 black color-coded bin will be arranged
						5 (H) Fitness during dangerous operation register was not maintained	Health Services	Available but need improvement	Fitness during dangerous operation register to be maintain
						8 (A) 2 wooden choties were not available	Furniture	Available but need improvement	2 wooden choties need to be arrange
						9 (A) 1 coated pot & 2 trays out of 4 were not available	Equipments	Available but need improvement	1 coated pot & 2 trays to be arranged
						10 (A) TT Vaccine at EC was not available	Medicine & Consumables	Available but need improvement	TT Vaccine for EC will be arranged
						11 (A) 1 Nurse at EC was not available	Human Resources	Available but need improvement	1 nruse to be recruited, subject to discussion with the management
	12	Fatullah Apparels	420	2	Mr. Harunur Rashid, Jakir Hossain	4 (A) 3 out of 4 color coded waste bin were available	Utilities	Available but need improvement	One green color-coded bin will be arranged
						9 (A) 2 out of 6 Pcs of Hand towels were available	Equipments	Available but need improvement	4 Pcs of Hand towels will be arranged
						10 (A) Ointment for eye was not available	Medicine & Consumables	Available but need improvement	Ointment to the eye need to arrange
						10 (B) Not maintained an expiry medicine list as regular	Medicine & Consumables	Available but need improvement	Will maintain an expiry medicine list
	13	Fakir Fashion Ltd	18422	7	Mr. Hasan Muhammad Shibli, Jakir Hossain	5 (C) Free of cost Medicine & food for employees taking treatment at patient bed was not available	Health Services	Available but need improvement	Supplimentary food will be arranged
						5 (H) Register of employees operating dangerous operations were not maintained	Health Services	Available but need improvement	Will maintain the register
						9 (A) -6 hand towels -Glass measurement tools were not available	Equipment	Available but need improvement	-6 Towels -Glass measurement tools need to be arranged
	14	Robin Tex		5	Mr. Harunur Rashid & Jakir Hossain	4 (A) Bio medical Waste management through four colour coded bins (black, yellow, green and red) were not avilable	Utilities	Available but need improvement	4 color coded bin to be need to arrange
	15	S M Knitwear Ltd	7500	7	Mitu Basak & Saber Al Tarek	4 (A) 3 out of 4 color coded bin were available	Utilities	Available but need improvement	Black color coded bin will be arranged
						8(A) 6 out of 9 Chairs at EC were available	Furniture	Available but need improvement	3 Chairs to be implemented in 30 days
